# Supplementary material for: An Imprinted Locus Epistatically Influences Nstr1 and Nstr2 to Control Resistance to Nerve Sheath Tumors in a Neurofibromatosis Type 1 Mouse Model
Source: Oxford University Press journal article supplement (doi:10.1158/0008-5472.can-05-1480), 2006-01-01
Supplement: 00085472can051480-sup-suppementary_figure_2.xls [file 00085472can051480-sup-suppementary_figure_2.xls]

## Sheet: Sheet1
Supplementary Figure 1: Haplotype Map of nstr2 on chromosome 15 and nstr1 on chromosome 19
Chromosome 15
AC	Pos	v_start	v_end	orient	C57BL_6J	C3H_HeJ	DBA_2J	A_J	129_Sv	CAST_Ei	CBA_J	SJL_J	v_pos	major	show
02.MMHAP94FLA2	132	32012071	32012252	+	T	T	T	C	C	C			32012203	T	2
X97817	41	32793171	32793355	+	G	A	A	G	A	A	A		32793212	G	2
X97817	63	32793171	32793355	+	A	A	A	A	A	G			32793234	A	2
12.MMHAP35FLD3	76	32804635	32804815	-	T	T	T	T	T	C			32804739	T	2
U00674	109	33125654	33125819	+	C	C	C	C	C	A			33125763	C	2
U00674	110	33125654	33125819	+	C	C	C	C	C	A			33125764	C	2
AA960457	414	33126252	33126756	-		T	T	T	A				33126635	T	2
AA960457	301	33126252	33126756	-	T	T	T	T	C				33126616	T	2
AA960457	272	33126252	33126756	-	-	-	-	-	GTTTTT				33126570	-	2
AA960457	212	33126252	33126756	-	G	G	G	G	A				33126569	G	2
AA960457	205	33126252	33126756	-	C	C	C	C	G	G			33126559	C	2
AA960457	187	33126252	33126756	-		T	T	T	T	A			33126544	T	2
AA960457	186	33126252	33126756	-	G	G	G	G	A	A			33126484	G	2
AA409043	218	34244678	34245095	+	A	A	A	A	G	A			34244896	A	2
AV353288	253	34246850	34247335	-	G	G	G		A				34247082	G	2
U50631	112	34588516	34588677	-	G	G	G	G	A	G			34588565	G	2
U28726	81	34981014	34981168	-	G	G	G	G	A	G			34981087	G	2
44.MHAa63d8	31	35716289	35716481	+	G	G	G	G	A	A			35716320	G	2
44.MHAa63d8	163	35716289	35716481	+	T	T	T	T	T	C			35716452	T	2
AI987733	145	36580830	36581248	+	A	A	A	A	A	C			36580975	A	2
48.MMHAP37FRH12	103	37007681	37007832	-	G	G	G	G	G	A			37007729	G	2
45.MMHAP33FLG6	36	37167914	37168081	+	C	C	C	C		T			37167950	C	2
45.MMHAP33FLG6	87	37167914	37168081	+	C	C	C	C	T	T			37168001	C	2
41.MMHAP64FRF11	133	37417673	37417826	+	A	A	A	A	A	G			37417806	A	2
mHAa57c12	77	37671418	37671531	-	T			C					37671489	T	2
mHAa57c12	42	37671418	37671531	-	T	T		A	T				37671454	T	2
AI115143	288	38434000	38434491	-	G	G	G	G	G	C			38434436	G	2
AI115143	119	38434000	38434491	-	G	G	G	G	G	A			38434372	G	2
AI115143	55	38434000	38434491	-	A	A	A	A	A	C			38434203	A	2
45.MMHAP36FRG12	85	41919640	41919823	-	T	T	A	A	T	T			41919768	T	2
45.MMHAP36FRG12	55	41919640	41919823	-	C	C	T	T	C	C			41919738	C	2
02.MMHAP64FRA8	122	42775475	42775632	-	C	C	C	C	T	C			42775594	C	2
02.MMHAP64FRA8	78	42775475	42775632	-	A	A	A	A	G	A			42775554	A	2
02.MMHAP64FRA8	38	42775475	42775632	-	A	A	A	A	G	A			42775510	A	2
AW260430	15	44573282	44573644	+	A	C	C	C	C	C		A	44573297	A	2
AW260430	196	44573282	44573644	+	-	A	-	A	-	A			44573478	-	2
AW260430	235	44573282	44573644	+	G	T	G	T	G	T			44573517	G	2
AW260430	331	44573282	44573644	+	C	T	C	T	C	T			44573613	C	2
47.MMHAP85FRH11	76	46999017	46999189	+	A	A	A	G	G	G	A	G	46999093	A	2
AA960008.1	56	51100320	51100810	+	T	T	T		T	-			51100376	T	2
AA960008.1	473	51100320	51100810	+	-		-		-	A			51100793	-	2
AA960008.1	475	51100320	51100810	+	-		-		-	AAC			51100795	-	2
AA960008.1	488	51100320	51100810	+	A		A		A	C			51100808	A	2
MHAa70e4	35	52066740	52066891	-	T		T	T	T	G			52066856	T	2
Chromosome 19
AC	Pos	v_start	v_end	orient	C57BL_6J	C3H_HeJ	DBA_2J	A_J	129_Sv	CAST_Ei	CBA_J	SJL_J	v_pos	major	show
U43836	116	3168350	3168537	-	A	A	A	A	A	C			7376979	A	2
AI846148	71	3545252	3545647	-	T	T	T	T	T	G			7376943	T	2
40.MMHAP45FRF10	113	3607482	3607652	-	C	C	T	C	C	C			7376942	C	2
13.MMHAP17FRE7	53	3812888	3813064	-	T	T	T	T	T	C			7376927	T	2
AI115133	43	4424518	4425043	+	-	-	A	-	-				7376889	-	2
AI115133	50	4424518	4425043	+	-	-	GGG	-	-				7376872	-	2
AI115133	136	4424518	4425043	+	A	A	C	A	A			A	7376836	A	2
AI839539	271	5218596	5219082	-	T	C	C	C	T				5771853	T	2
C78287	208	5457324	5457714	+	T	T	T	T		A			5462637	T	2
C78287	438	5457324	5457714	+	A	A	A	A		T			5457381	A	2
N28197	49	5462584	5462686	-	C	C	C	C	C	T			5457403	C	2
AV003220	341	5771597	5771966	-	C	C	C	C	C	T			5457762	C	2
